# Supplementary material for: β-Glucan-stimulated neutrophil secretion of IL-1α is independent of GSDMD and mediated through extracellular vesicles
Source: PubMed Central journal article supplement (PMC8186457; doi:10.1016/j.celrep.2021.109139), 2021-05-18
Supplement: NIHMS1709019-supplement-1.pdf [file NIHMS1709019-supplement-1.pdf]

Cell Reports, Volume 35

**Supplemental information**

**$\beta$ -Glucan-stimulated neutrophil secretion of IL-1 $\alpha$   
is independent of GSDMD and mediated  
through extracellular vesicles**

**Bridget Ratitong, Michaela Marshall, and Eric Pearlman**

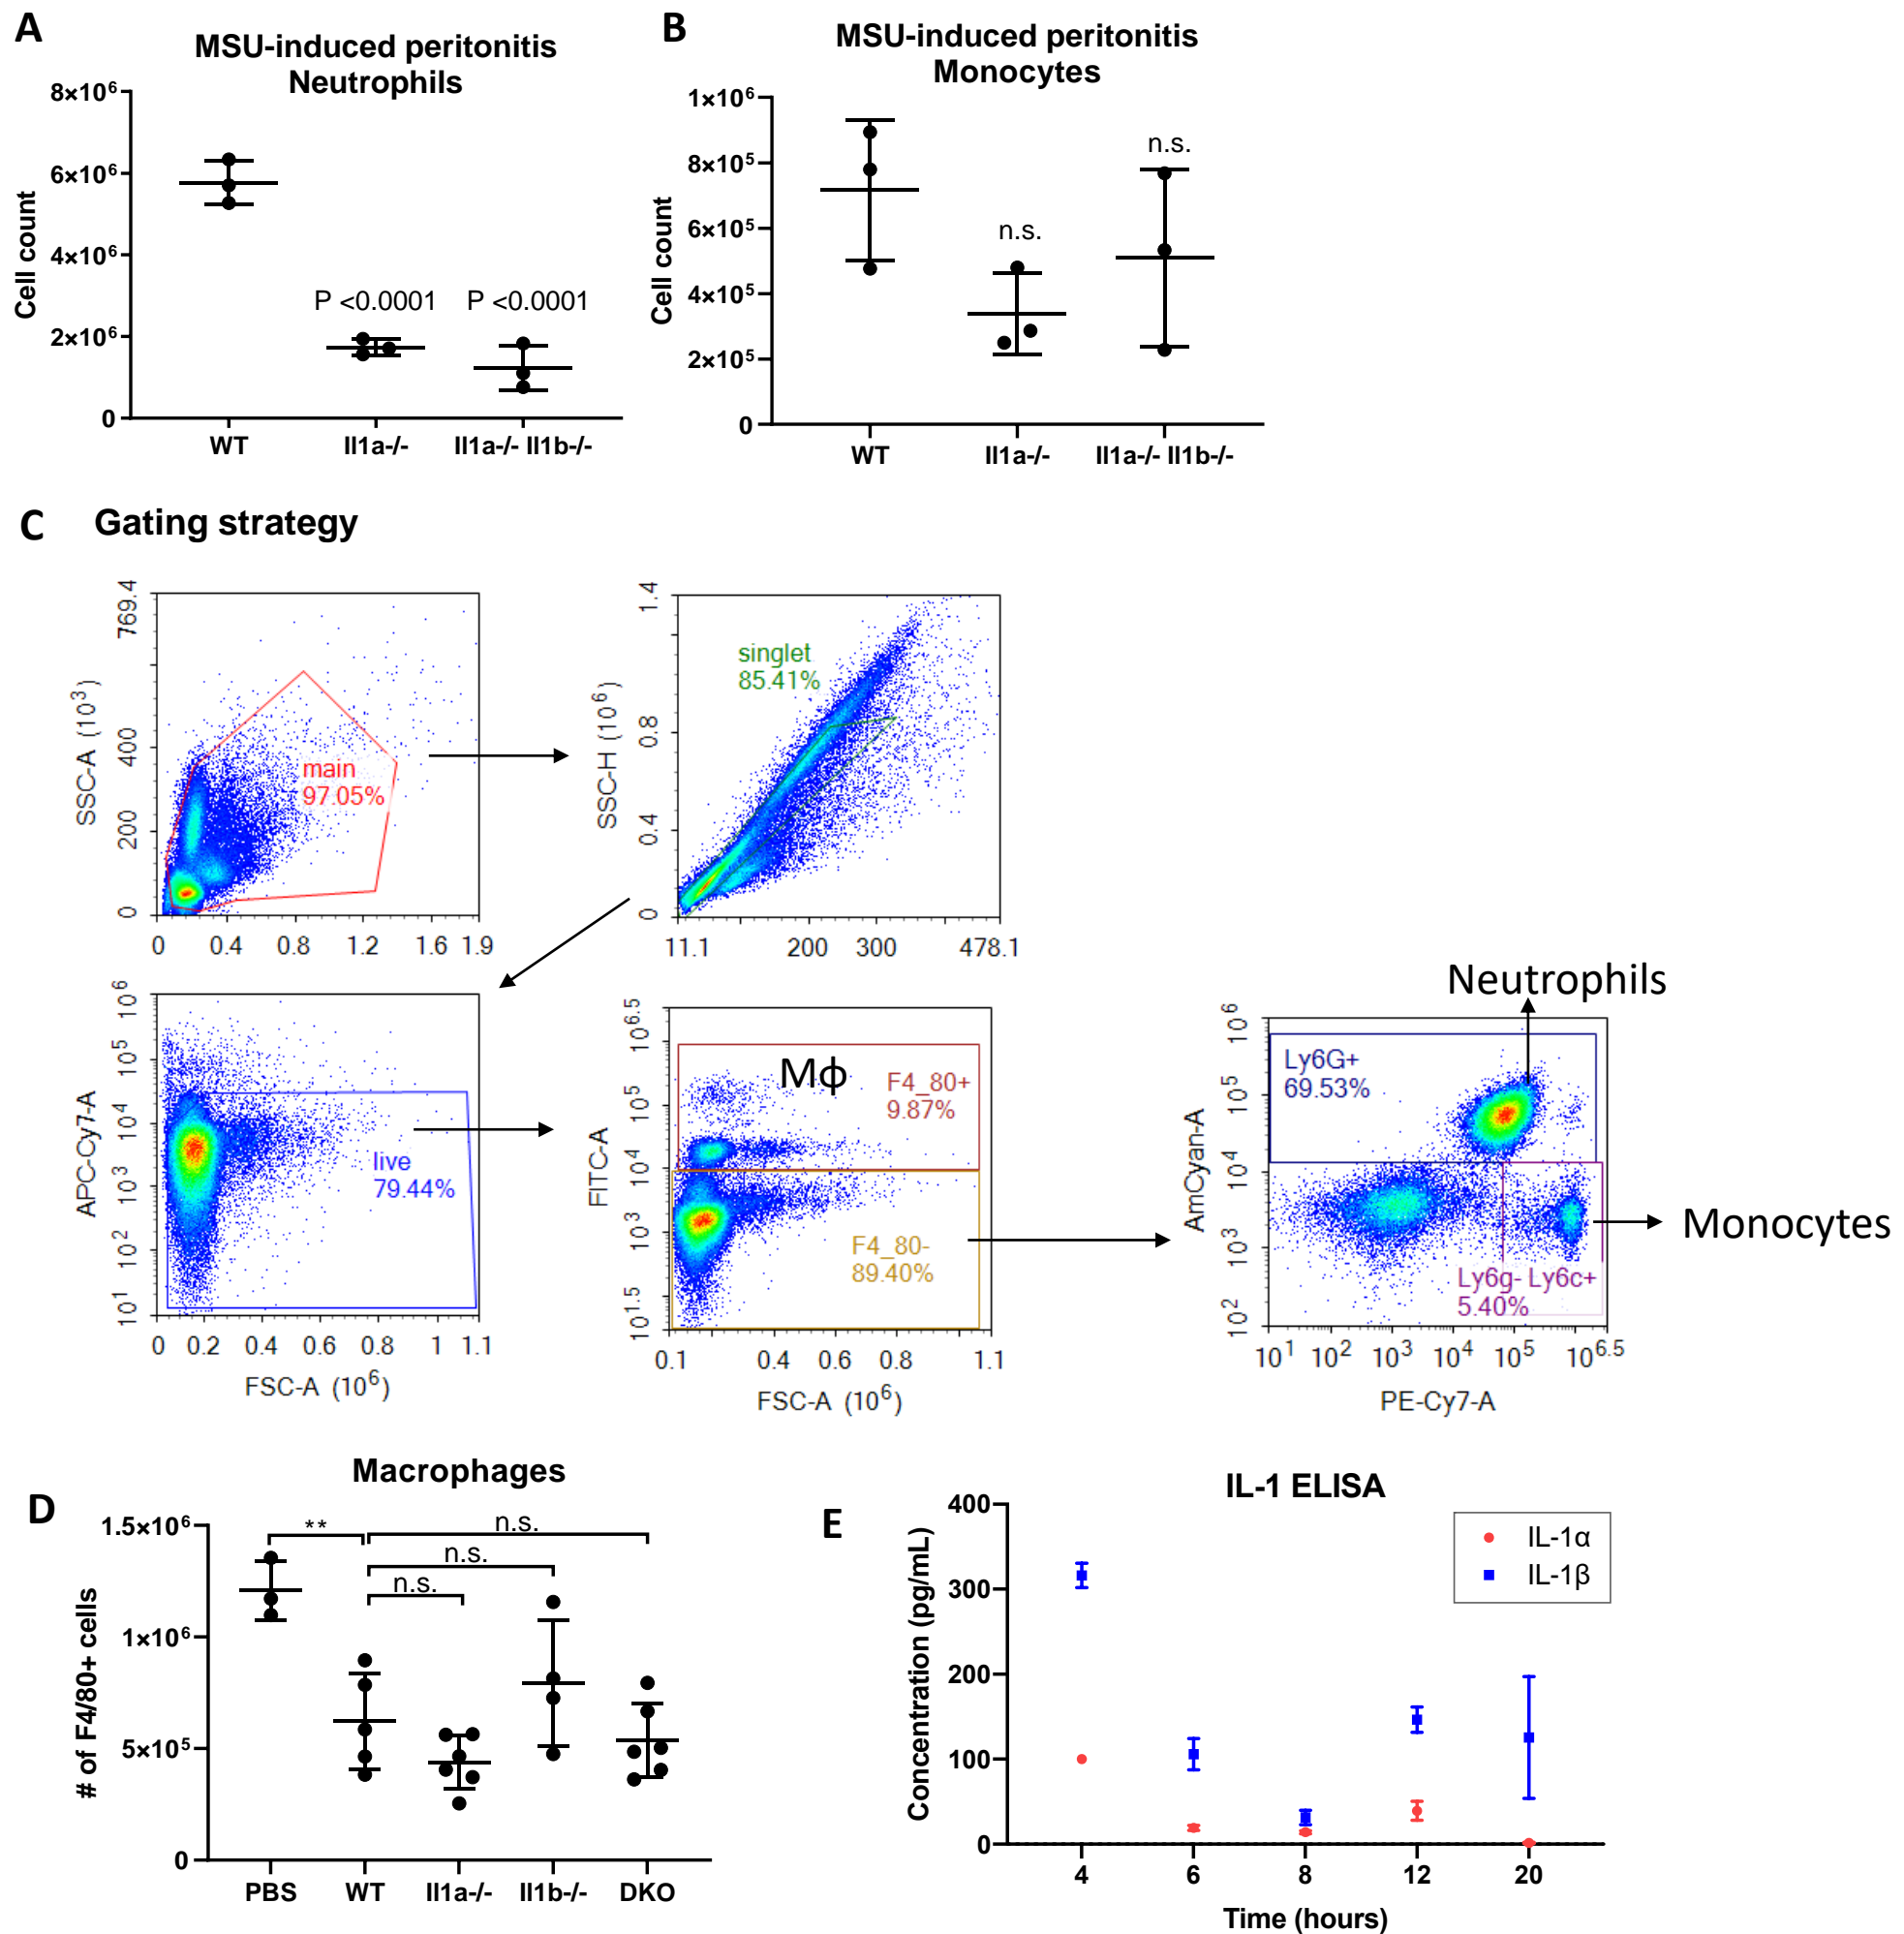

**Supplementary Figure 1. IL-1 $\alpha$  is important for neutrophil recruitment. Related to Figure 1.**

(A, B) Neutrophil and monocyte cell count quantified 4h after intraperitoneal injection of 2 mg/ mouse monosodium urate (MSU) into C57BL/6 (WT), IL-1 $\alpha$ <sup>-/-</sup>, and IL-1 $\alpha$ <sup>-/-</sup>/IL-1 $\beta$ <sup>-/-</sup> mice (n=3).

(C) Representative flow cytometry plots demonstrating gating strategy for live, singlet F4/80+ macrophages, F4/80- Ly6G+ neutrophils, and F4/80- Ly6G- Ly6C+ monocytes.

(D) F4/80+ macrophage cell counts from the peritoneal cavity of mice injected with swollen, heat killed *A. fumigatus* conidia.

(E) IL-1 $\alpha$  and IL-1 $\beta$  concentration from the peritoneal lavage fluid at multiple time points following injection of heat-killed *A. fumigatus* conidia (n=3).

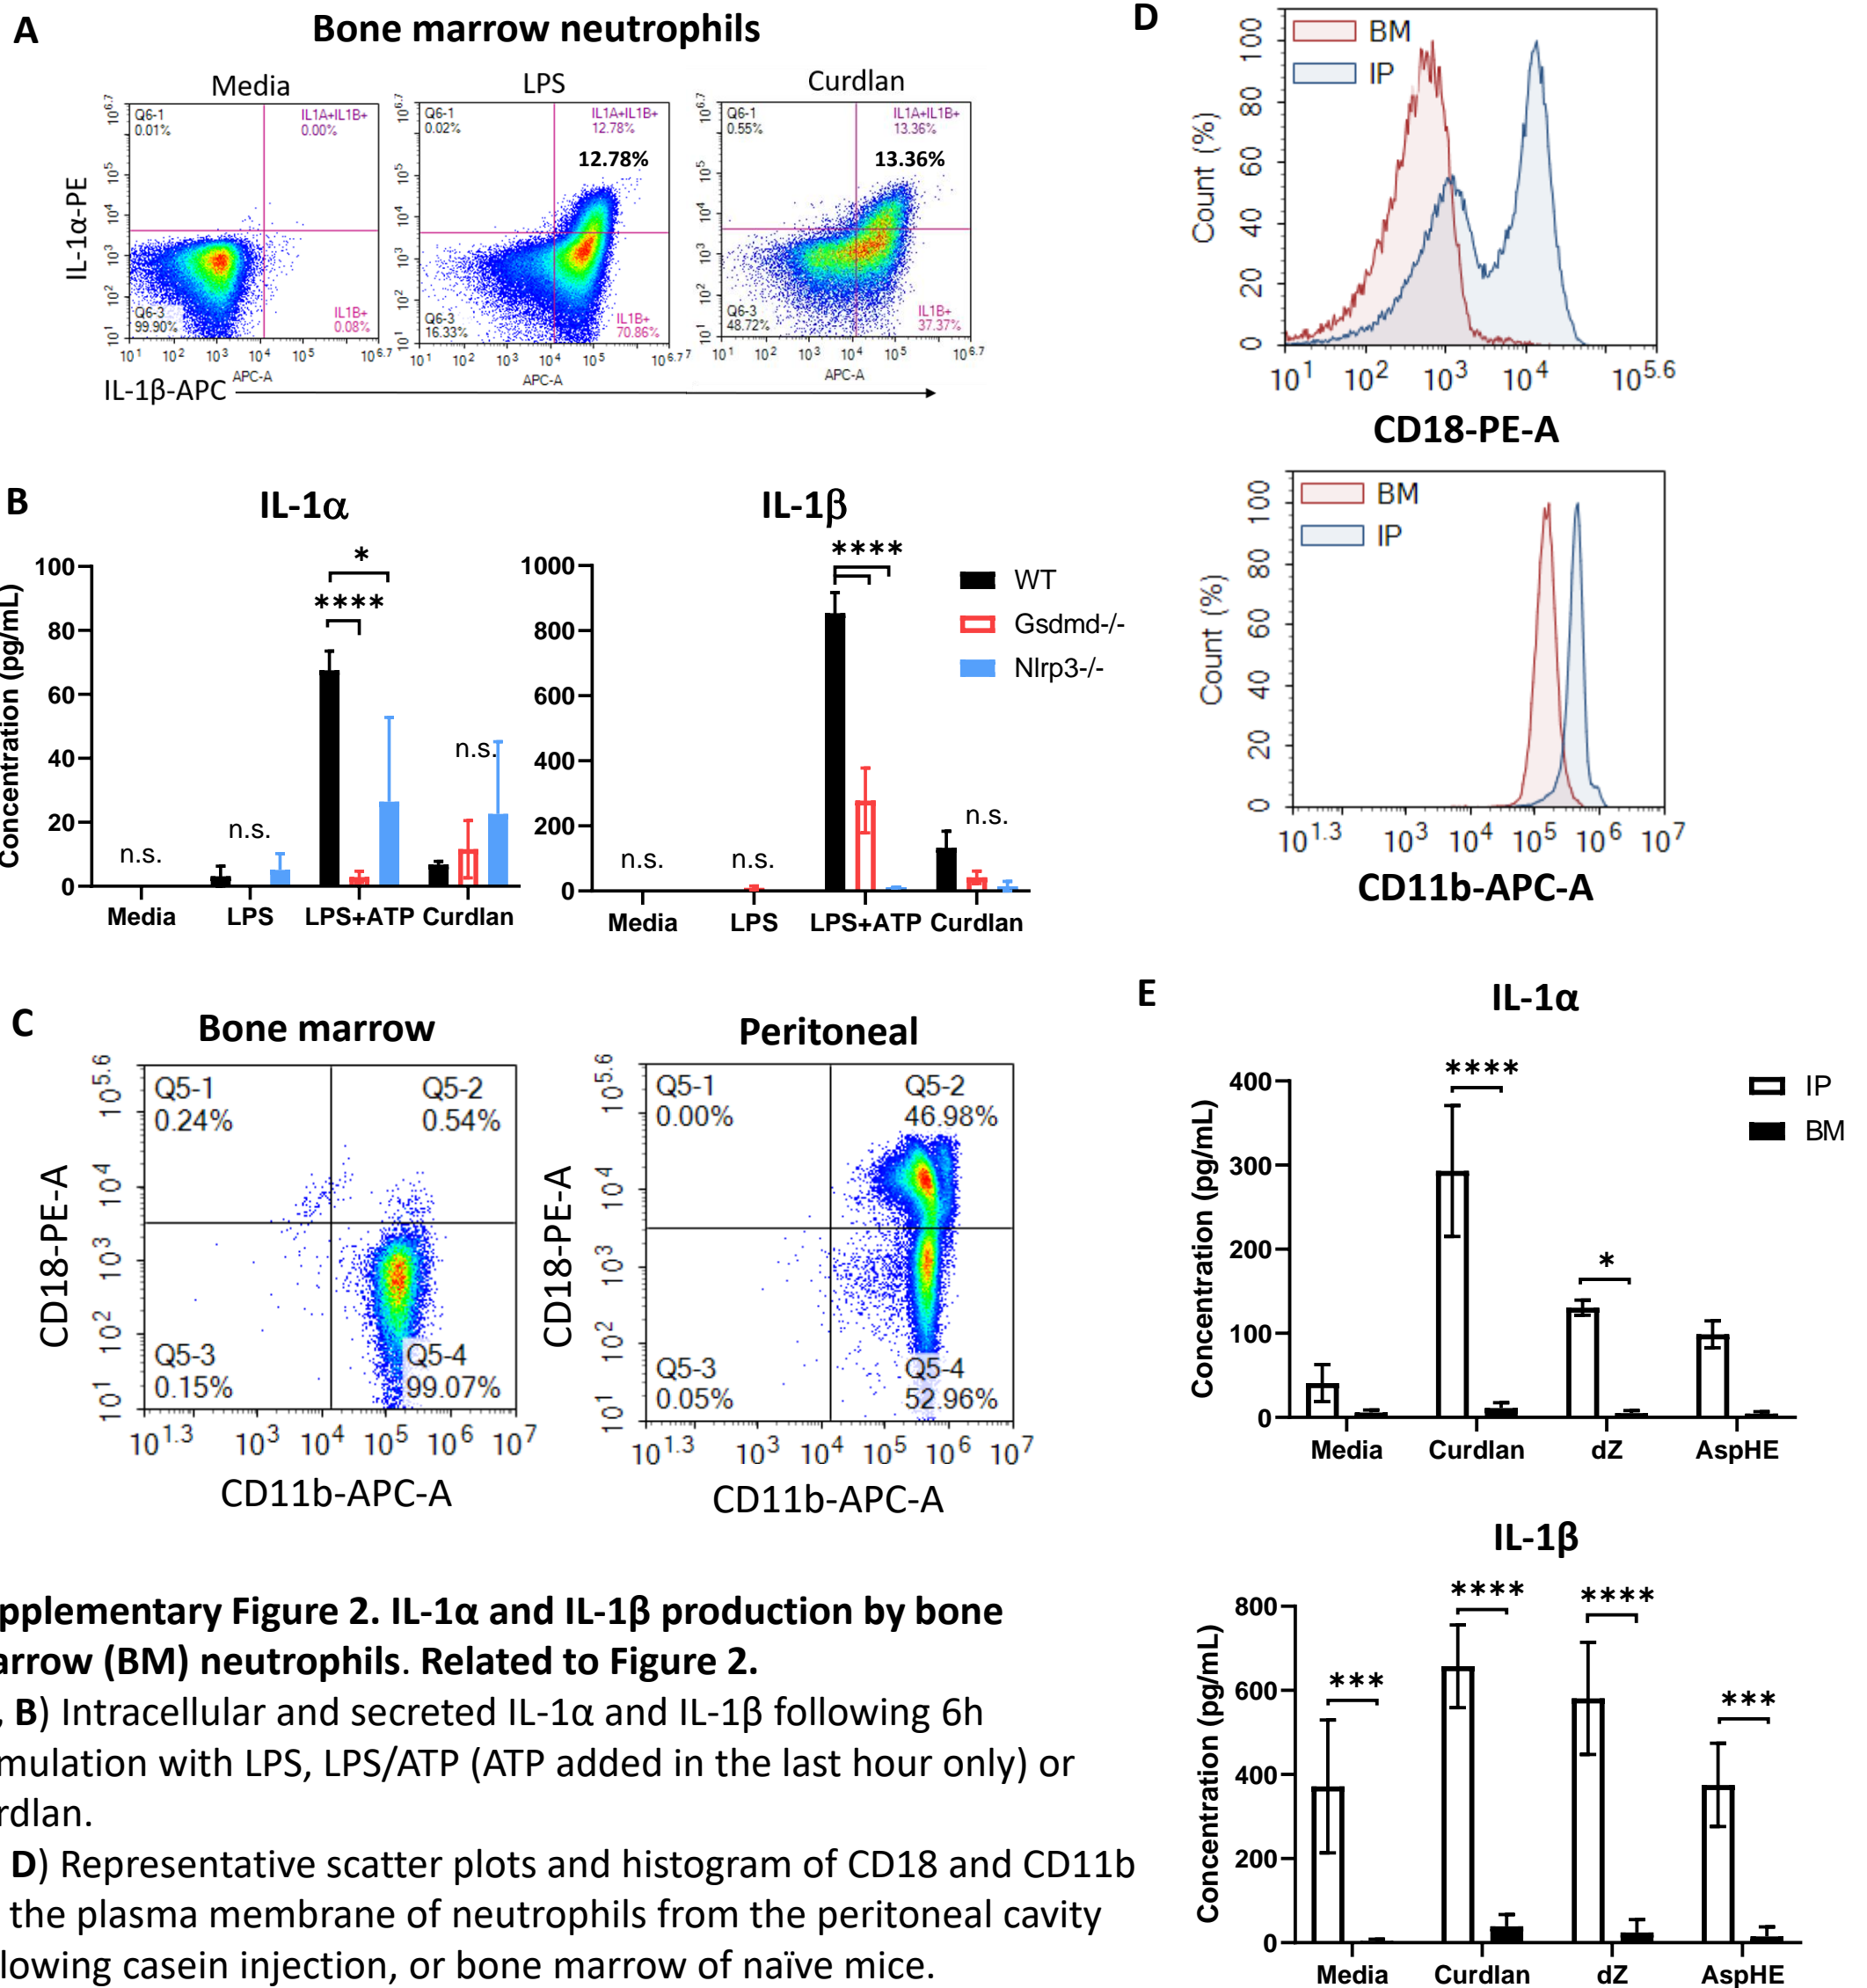

**Supplementary Figure 2. IL-1α and IL-1β production by bone marrow (BM) neutrophils. Related to Figure 2.**

(A, B) Intracellular and secreted IL-1α and IL-1β following 6h stimulation with LPS, LPS/ATP (ATP added in the last hour only) or curdlan.

(C, D) Representative scatter plots and histogram of CD18 and CD11b on the plasma membrane of neutrophils from the peritoneal cavity following casein injection, or bone marrow of naive mice.

(E) β-glucan secretion of IL-1α and IL-1β by BM compared with peritoneal (IP) neutrophils in response to curdlan, depleted zymosan (dZ), or *A. fumigatus* hyphal extract (AspHE).

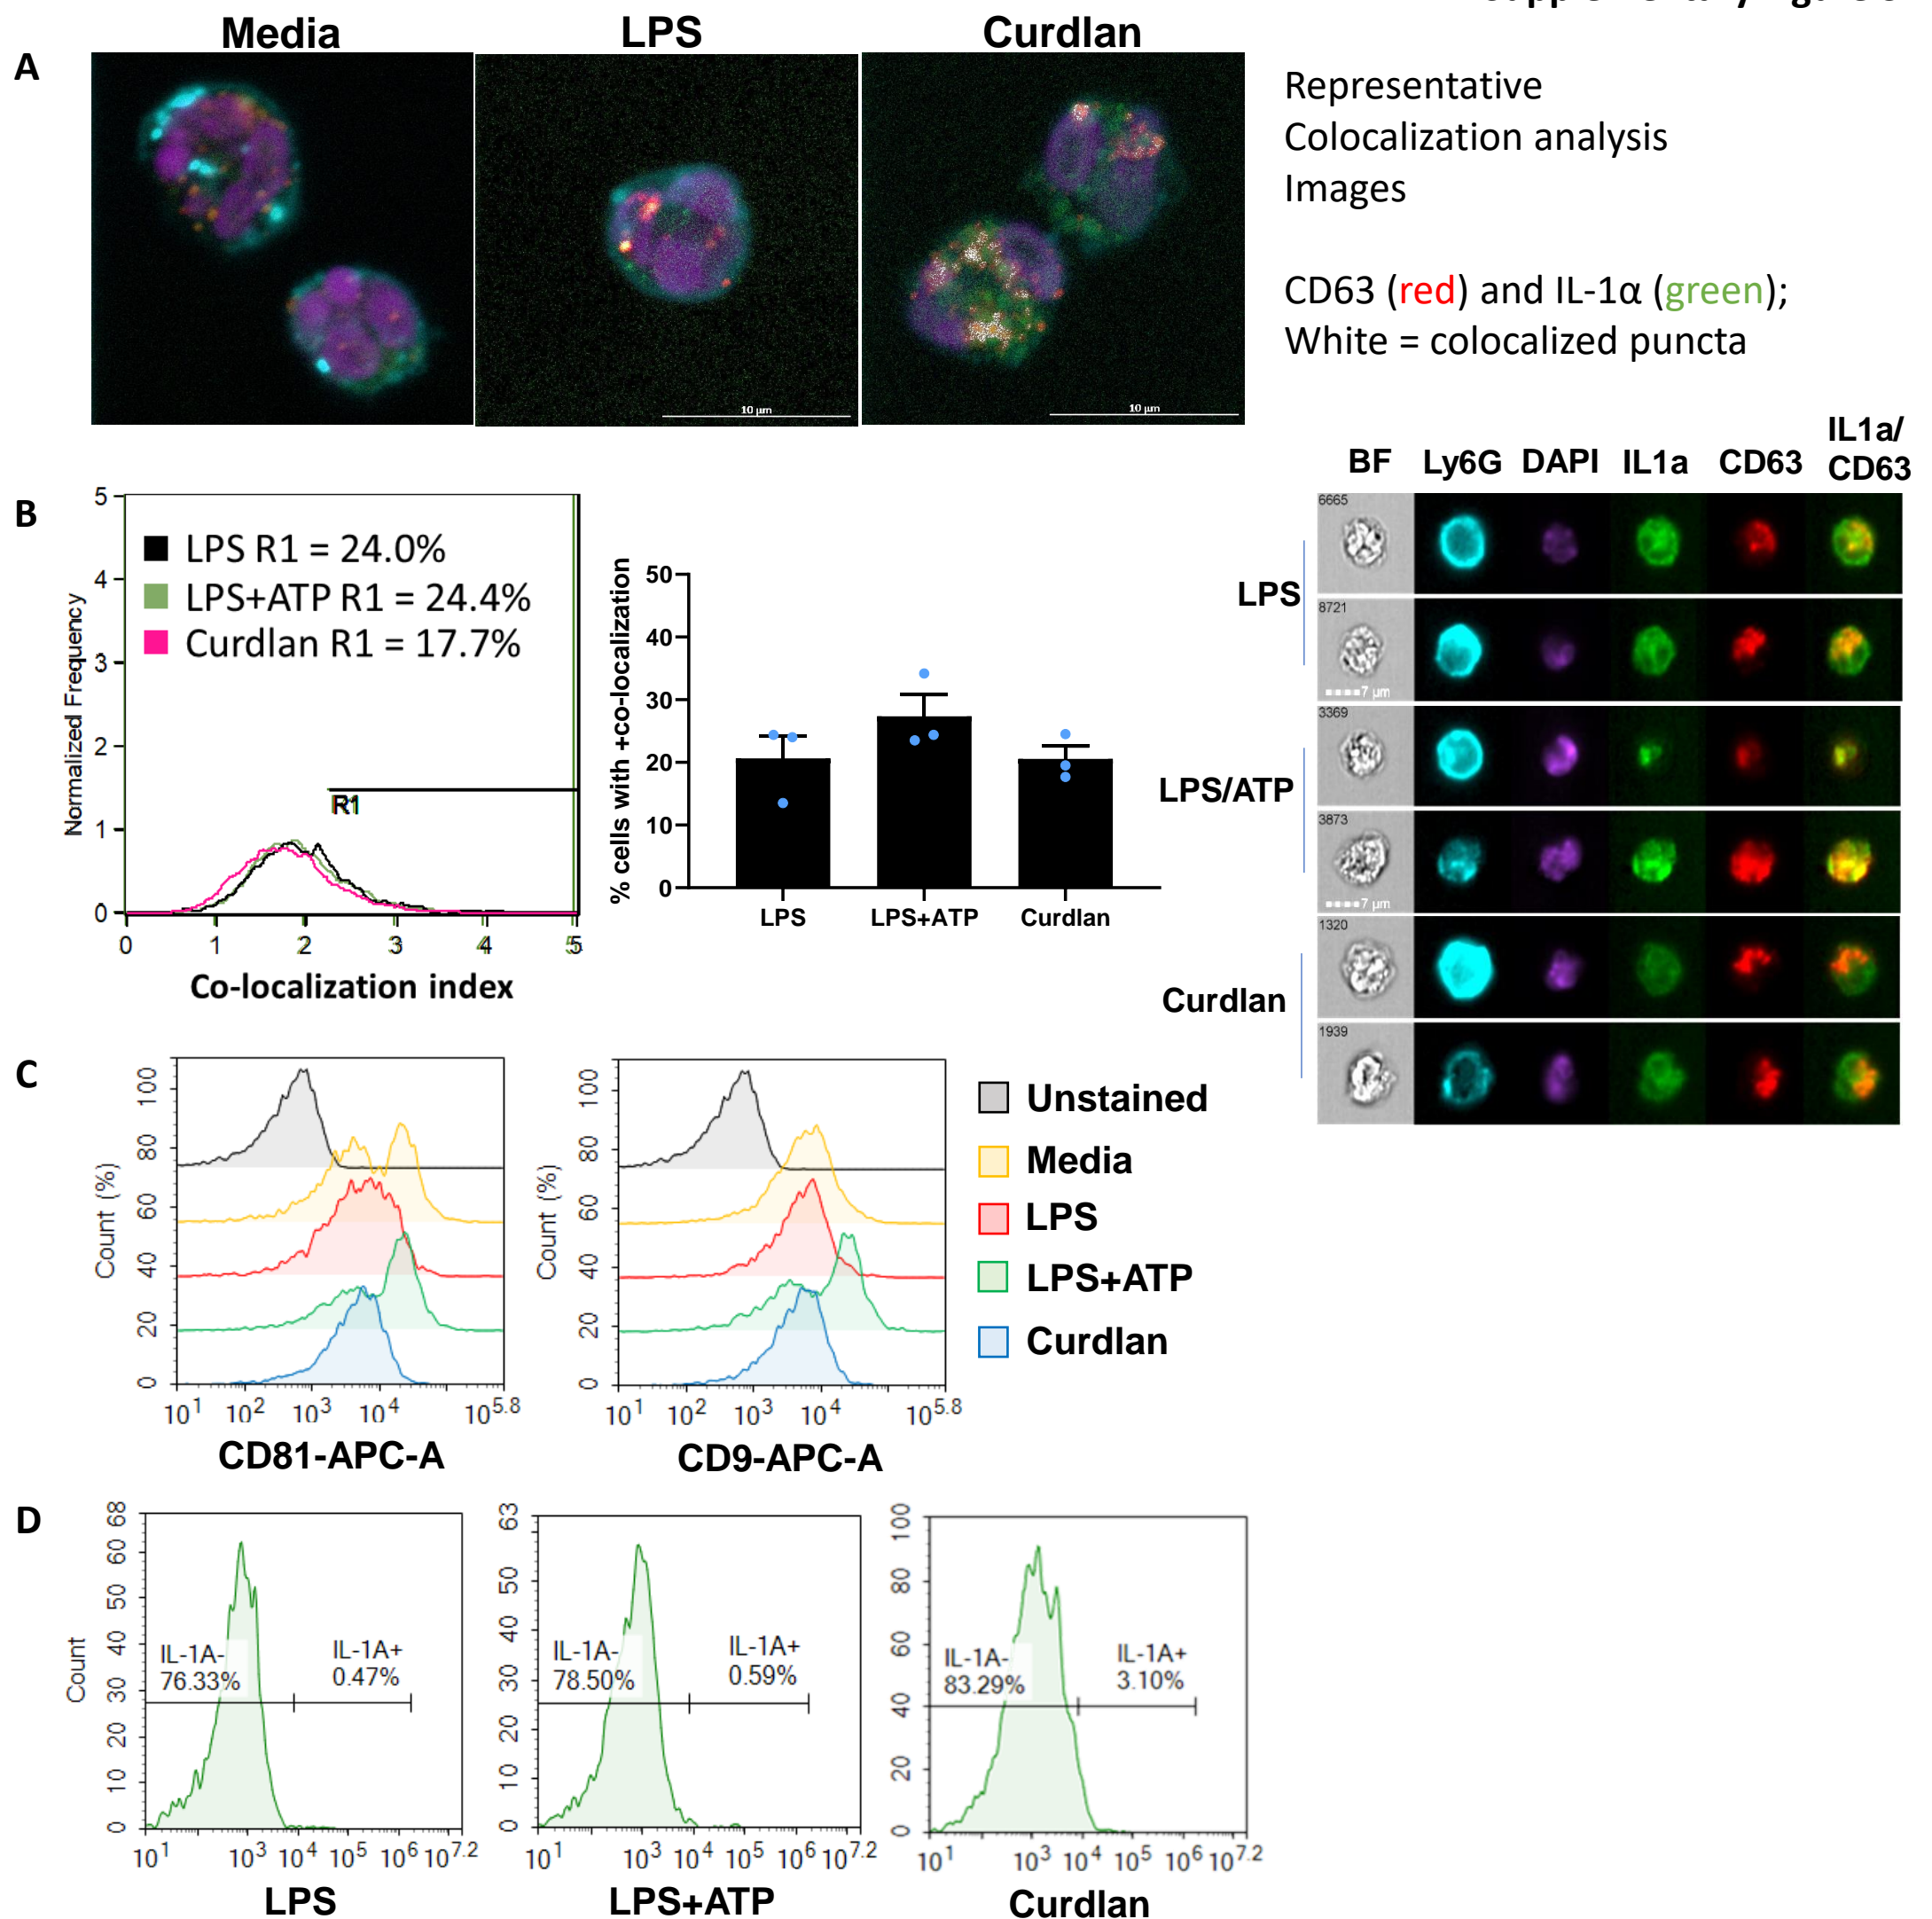

**Supplementary Figure 3. Characterization of extracellular vesicles from peritoneal neutrophils. Related to Figure 4.**

(A) Co-localization analysis by ImageJ of CD63 and IL-1α in unstimulated, LPS- or curdlan-stimulated peritoneal neutrophils. CD63 (red) and IL-1α (green); colocalization of CD63 and IL-1α is shown in white.

(B) Representative Amnis ImageStream™ images (left) showing plasma membrane Ly6G and intracellular CD63/IL-1a. Colocalization coefficient of CD63/IL-1a (center panel), and percent co-localization (right panel) of neutrophils stimulated with LPS, LPS/ATP, or curdlan (n=3)

(C) Flow cytometry of representative isolated EVs stained with exosome markers CD81 or CD9

(D) Representative flow histogram showing no IL-1α on membrane of isolated EVs

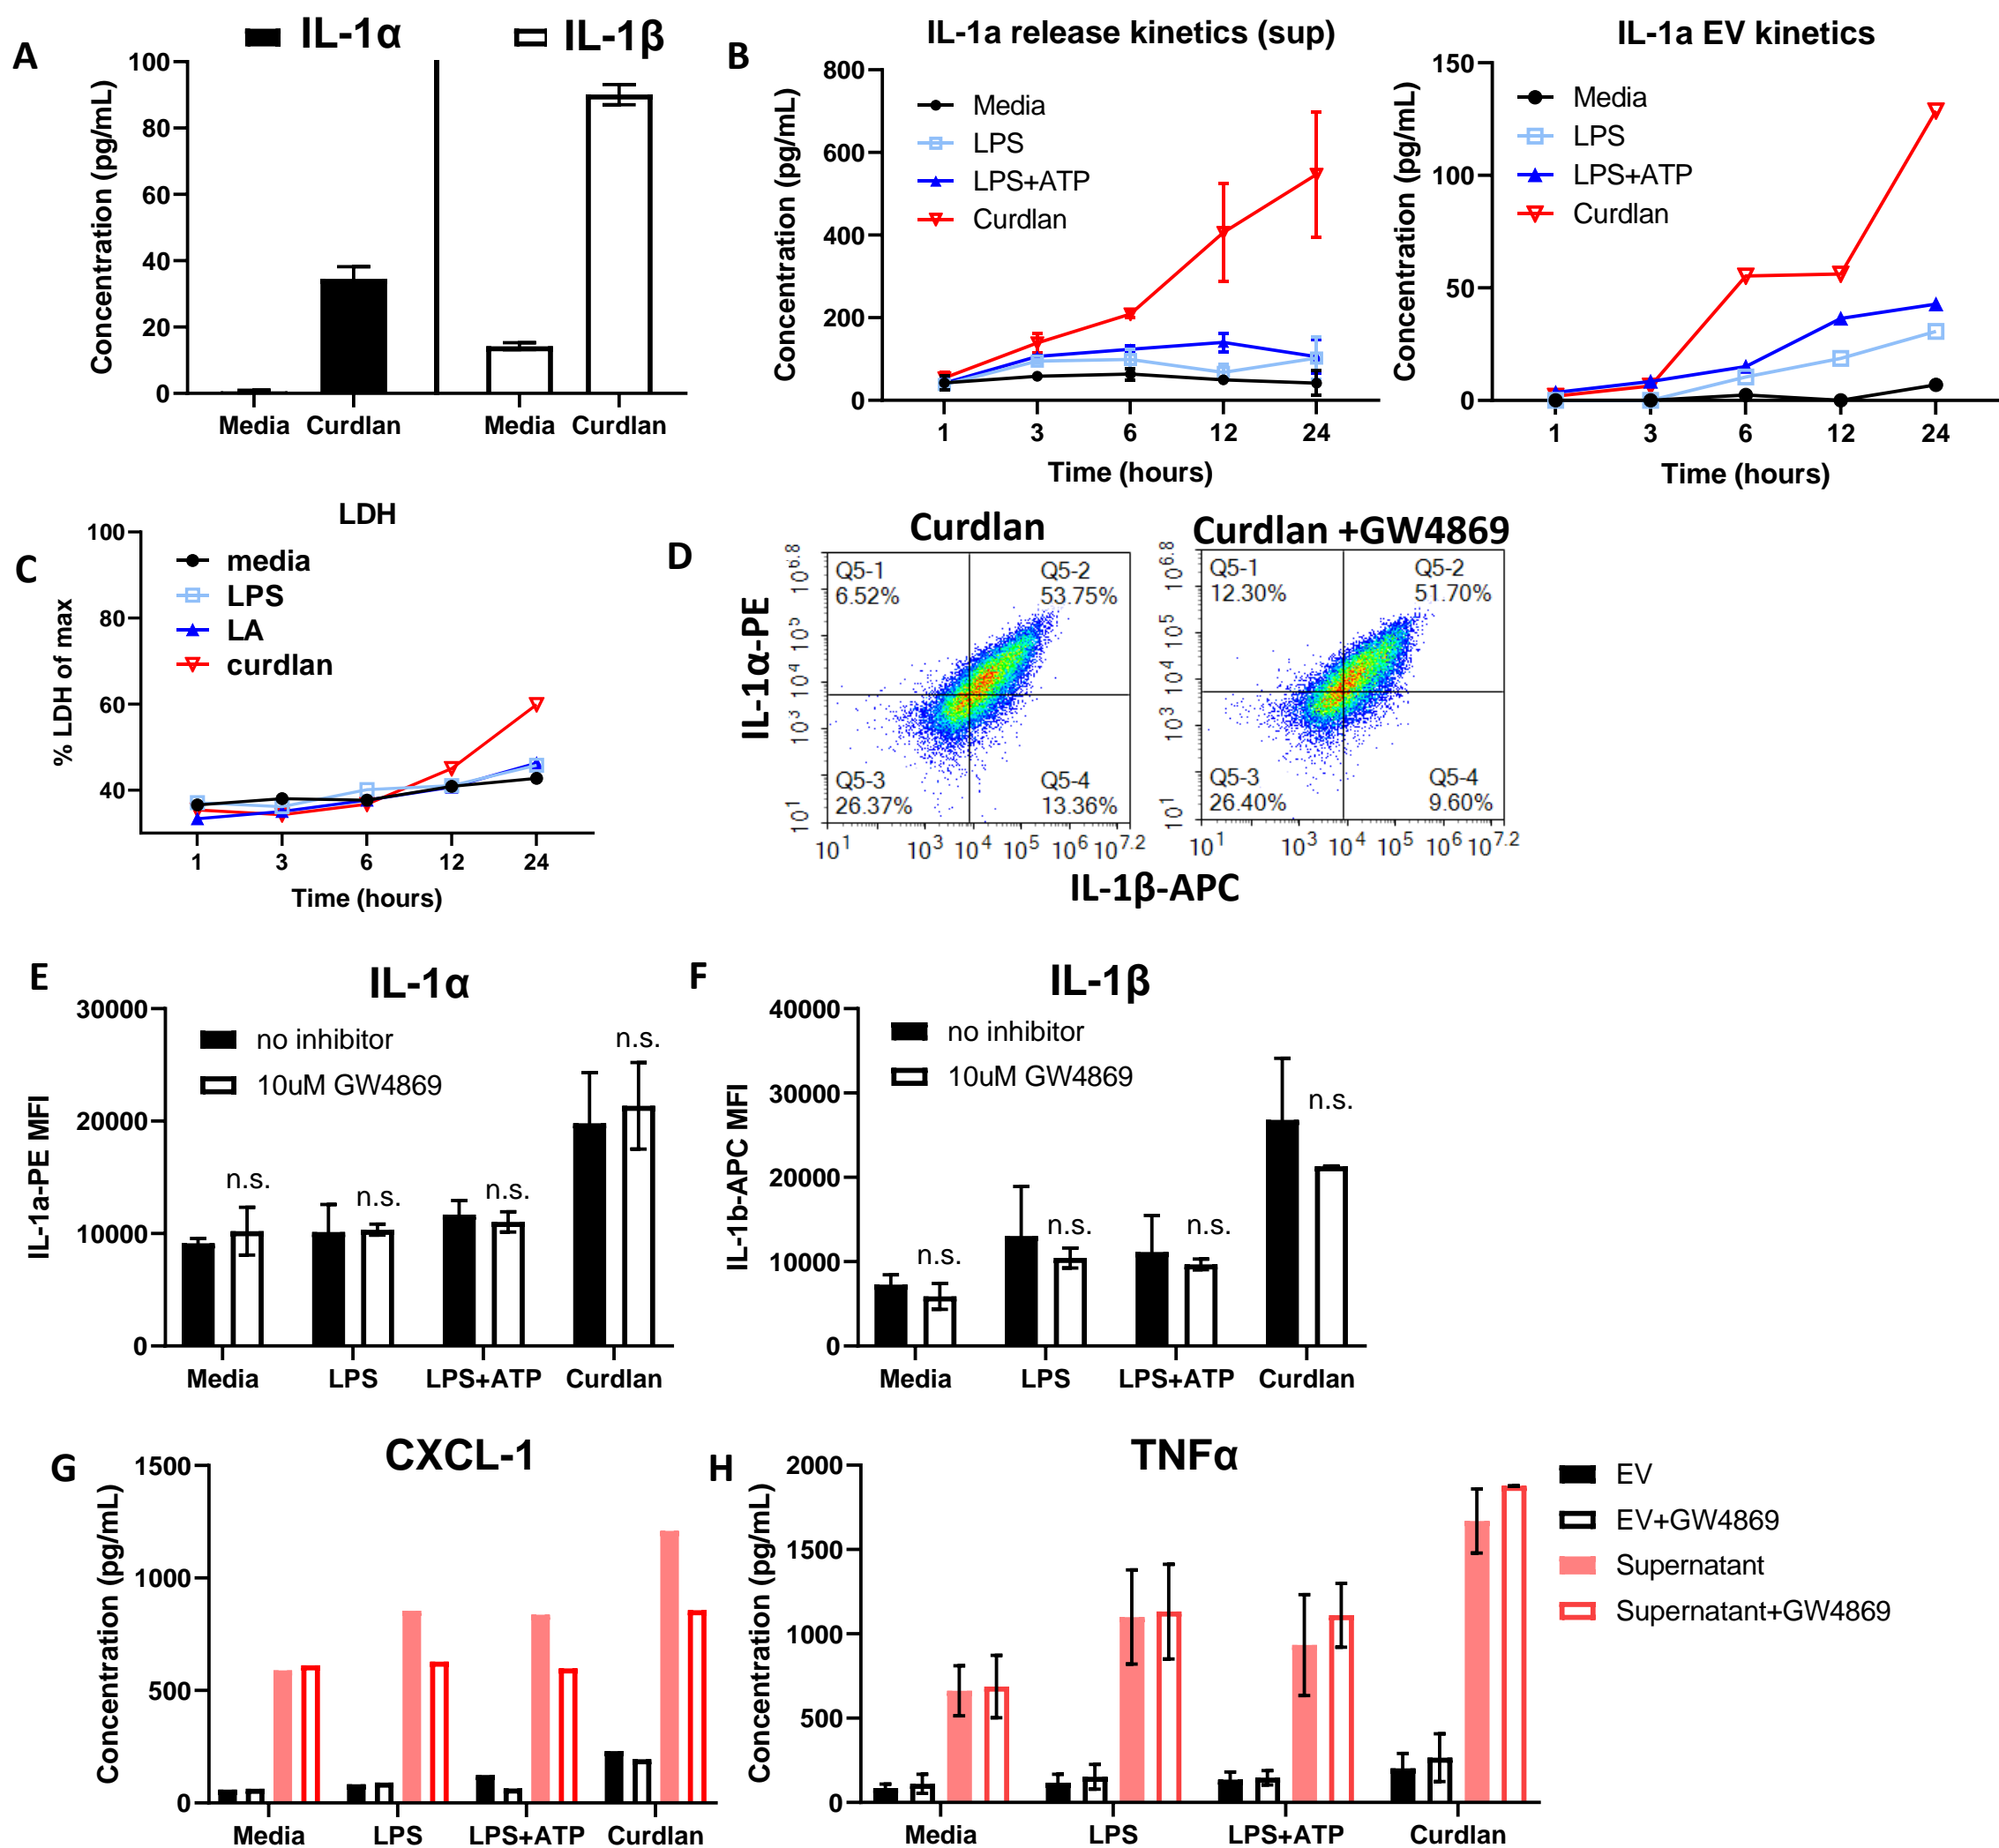

**Supplementary Figure 4. IL-1 secretion through EVs increase over time and GW4869 does not affect IL-1 production. Related to Figure 4.**

(A) IL-1 $\alpha$  and IL-1 $\beta$  produced by neutrophil exosomes isolated by differential ultracentrifugation (pellet at 100,000xg) and lysed by Triton-X100

(B) Total IL-1 $\alpha$  (left) and lysed EV IL-1 $\alpha$  (right) time course of secretion by neutrophils stimulated with LPS, LPS/ATP, or curdlan for 1, 3, 6, 12, and 24 hours.

(C) LDH release time course from neutrophils stimulated for 1, 3, 6, 12, and 24 hours.

(D) Representative flow cytometry plots of intracellular IL-1 $\alpha$ -PE and IL-1 $\beta$ -APC in GW4869-pre treated neutrophils showing no effect of the inhibitor on intracellular staining.

(E,F) MFI quantification of intracellular IL-1 $\alpha$ -PE and IL-1 $\beta$ -APC in GW4869-treated neutrophils

(G, H) CXCL1 and TNF $\alpha$  is not present in EVs or blocked by the exosome inhibitor GW4869
